# Supplementary material for: An Improved VMD-Based Denoising Method for Time Domain Load Signal Combining Wavelet with Singular Spectrum Analysis
Source: Hindawi journal article supplement (doi:10.1155/2020/1485937), 2020-04-29
Supplement: f1 [file 1485937.f1.xlsx]

## Sheet: Sheet1
Measured signal in the working section of linear harvesting
Time (s)	Microstrain (me)
0.002	-3.973
0.004	-3.538
0.006	-3.538
0.008	-3.973
0.01	-4.841
0.012	-5.275
0.014	-5.709
0.016	-5.709
0.018	-5.275
0.02	-4.841
0.022	-4.841
0.024	-5.275
0.026	-6.577
0.028	-7.445
0.03	-7.879
0.032	-7.011
0.034	-6.143
0.036	-4.841
0.038	-4.407
0.04	-3.538
0.042	-3.104
0.044	-2.67
0.046	-1.802
0.048	-1.802
0.05	-2.67
0.052	-3.538
0.054	-4.841
0.056	-5.275
0.058	-4.841
0.06	-4.407
0.062	-3.973
0.064	-4.407
0.066	-5.275
0.068	-6.577
0.07	-7.879
0.072	-8.747
0.074	-9.616
0.076	-10.05
0.078	-10.05
0.08	-10.05
0.082	-10.48
0.084	-10.48
0.086	-10.92
0.088	-11.79
0.09	-12.65
0.092	-13.09
0.094	-13.96
0.096	-13.96
0.098	-13.52
0.1	-12.65
0.102	-11.79
0.104	-11.79
0.106	-12.22
0.108	-12.65
0.11	-12.65
0.112	-12.22
0.114	-11.79
0.116	-11.79
0.118	-12.22
0.12	-13.52
0.122	-14.82
0.124	-14.82
0.126	-14.39
0.128	-13.52
0.13	-13.52
0.132	-13.96
0.134	-14.39
0.136	-13.96
0.138	-13.52
0.14	-13.09
0.142	-12.65
0.144	-13.09
0.146	-13.96
0.148	-14.39
0.15	-14.82
0.152	-14.82
0.154	-14.82
0.156	-15.26
0.158	-15.69
0.16	-16.56
0.162	-17.86
0.164	-18.73
0.166	-19.6
0.168	-20.03
0.17	-20.03
0.172	-19.6
0.174	-18.73
0.176	-17.86
0.178	-17
0.18	-17.43
0.182	-18.3
0.184	-19.6
0.186	-20.47
0.188	-20.9
0.19	-20.47
0.192	-20.03
0.194	-19.6
0.196	-19.17
0.198	-18.3
0.2	-17
0.202	-16.13
0.204	-15.26
0.206	-14.82
0.208	-14.82
0.21	-14.82
0.212	-14.39
0.214	-13.52
0.216	-12.65
0.218	-11.35
0.22	-10.92
0.222	-10.48
0.224	-10.05
0.226	-9.616
0.228	-9.182
0.23	-8.313
0.232	-7.445
0.234	-6.577
0.236	-5.709
0.238	-5.275
0.24	-4.841
0.242	-3.973
0.244	-3.104
0.246	-2.236
0.248	-2.236
0.25	-2.236
0.252	-2.236
0.254	-2.236
0.256	-2.236
0.258	-1.368
0.26	-0.9339
0.262	-0.4998
0.264	-0.9339
0.266	-0.9339
0.268	-0.4998
0.27	-0.4998
0.272	-0.06575
0.274	0.3683
0.276	0.8024
0.278	1.236
0.28	2.105
0.282	2.539
0.284	3.407
0.286	3.841
0.288	3.841
0.29	3.407
0.292	2.539
0.294	2.105
0.296	2.105
0.298	2.539
0.3	3.407
0.302	3.407
0.304	3.407
0.306	2.973
0.308	2.539
0.31	1.671
0.312	0.8024
0.314	0.3683
0.316	-0.06575
0.318	-0.06575
0.32	-0.06575
0.322	-0.4998
0.324	-0.9339
0.326	-1.802
0.328	-2.236
0.33	-1.802
0.332	-0.9339
0.334	-0.06575
0.336	1.236
0.338	1.671
0.34	2.105
0.342	2.539
0.344	2.539
0.346	1.671
0.348	0.8024
0.35	-0.4998
0.352	-1.802
0.354	-2.236
0.356	-1.802
0.358	-1.802
0.36	-2.236
0.362	-3.104
0.364	-4.407
0.366	-5.275
0.368	-5.709
0.37	-5.275
0.372	-5.275
0.374	-5.709
0.376	-6.577
0.378	-7.879
0.38	-8.747
0.382	-8.313
0.384	-7.879
0.386	-7.879
0.388	-8.747
0.39	-9.616
0.392	-10.48
0.394	-10.92
0.396	-10.92
0.398	-10.92
0.4	-10.92
0.402	-11.35
0.404	-11.35
0.406	-10.92
0.408	-10.48
0.41	-10.05
0.412	-10.05
0.414	-10.92
0.416	-12.22
0.418	-13.96
0.42	-15.26
0.422	-15.69
0.424	-14.82
0.426	-13.96
0.428	-12.65
0.43	-11.35
0.432	-10.48
0.434	-10.05
0.436	-9.182
0.438	-9.182
0.44	-9.182
0.442	-9.182
0.444	-9.616
0.446	-10.05
0.448	-10.48
0.45	-10.48
0.452	-10.48
0.454	-10.05
0.456	-9.616
0.458	-9.182
0.46	-8.313
0.462	-7.879
0.464	-7.011
0.466	-5.709
0.468	-5.275
0.47	-4.841
0.472	-5.275
0.474	-5.709
0.476	-6.143
0.478	-6.577
0.48	-7.011
0.482	-7.445
0.484	-7.879
0.486	-7.011
0.488	-5.275
0.49	-3.104
0.492	-1.368
0.494	-0.9339
0.496	-1.802
0.498	-3.104
0.5	-3.973
0.502	-3.538
0.504	-3.104
0.506	-2.67
0.508	-2.67
0.51	-3.538
0.512	-3.538
0.514	-3.538
0.516	-2.67
0.518	-1.368
0.52	-0.4998
0.522	-0.4998
0.524	-0.4998
0.526	-1.368
0.528	-1.802
0.53	-2.236
0.532	-1.802
0.534	-0.9339
0.536	-0.4998
0.538	-0.9339
0.54	-2.236
0.542	-3.104
0.544	-3.538
0.546	-3.538
0.548	-3.104
0.55	-2.236
0.552	-2.236
0.554	-2.236
0.556	-2.236
0.558	-2.236
0.56	-1.368
0.562	-0.4998
0.564	0.8024
0.566	1.671
0.568	1.236
0.57	0.3683
0.572	-0.4998
0.574	-1.368
0.576	-0.9339
0.578	-0.06575
0.58	1.236
0.582	2.973
0.584	3.841
0.586	4.275
0.588	3.841
0.59	2.973
0.592	2.105
0.594	1.671
0.596	1.671
0.598	2.105
0.6	2.539
0.602	2.539
0.604	2.539
0.606	2.105
0.608	2.105
0.61	2.539
0.612	3.407
0.614	3.841
0.616	4.275
0.618	3.407
0.62	2.539
0.622	1.671
0.624	1.671
0.626	2.105
0.628	2.973
0.63	3.407
0.632	3.841
0.634	3.407
0.636	2.539
0.638	1.671
0.64	0.8024
0.642	0.8024
0.644	0.3683
0.646	0.3683
0.648	0.8024
0.65	0.8024
0.652	1.236
0.654	1.236
0.656	0.8024
0.658	0.3683
0.66	-0.06575
0.662	-0.4998
0.664	-1.368
0.666	-2.236
0.668	-3.104
0.67	-3.538
0.672	-3.538
0.674	-3.104
0.676	-3.104
0.678	-3.104
0.68	-3.973
0.682	-4.407
0.684	-5.275
0.686	-5.275
0.688	-4.841
0.69	-4.407
0.692	-4.407
0.694	-4.407
0.696	-4.841
0.698	-5.275
0.7	-5.709
0.702	-5.709
0.704	-5.275
0.706	-5.275
0.708	-4.841
0.71	-4.407
0.712	-3.973
0.714	-3.538
0.716	-3.538
0.718	-3.538
0.72	-3.973
0.722	-3.538
0.724	-2.236
0.726	-0.9339
0.728	0.3683
0.73	0.8024
0.732	0.3683
0.734	0.3683
0.736	0.8024
0.738	1.236
0.74	2.105
0.742	2.539
0.744	2.973
0.746	3.407
0.748	4.275
0.75	5.143
0.752	6.011
0.754	6.011
0.756	5.577
0.758	5.577
0.76	6.446
0.762	6.88
0.764	7.314
0.766	6.446
0.768	4.709
0.77	3.407
0.772	2.973
0.774	3.841
0.776	6.011
0.778	7.748
0.78	8.616
0.782	8.616
0.784	8.182
0.786	7.748
0.788	7.748
0.79	7.748
0.792	7.748
0.794	7.314
0.796	7.314
0.798	6.88
0.8	6.446
0.802	6.011
0.804	5.577
0.806	5.143
0.808	6.011
0.81	6.88
0.812	7.314
0.814	7.314
0.816	6.011
0.818	4.709
0.82	3.841
0.822	3.841
0.824	3.841
0.826	4.275
0.828	4.709
0.83	4.709
0.832	3.841
0.834	2.973
0.836	1.671
0.838	0.8024
0.84	0.3683
0.842	-0.06575
0.844	-0.06575
0.846	0.3683
0.848	0.8024
0.85	2.105
0.852	3.407
0.854	4.275
0.856	5.143
0.858	4.709
0.86	3.841
0.862	2.539
0.864	1.671
0.866	2.105
0.868	3.407
0.87	5.577
0.872	7.314
0.874	7.314
0.876	6.011
0.878	3.407
0.88	1.671
0.882	0.8024
0.884	0.8024
0.886	1.236
0.888	1.236
0.89	1.236
0.892	1.236
0.894	0.8024
0.896	1.236
0.898	2.539
0.9	4.275
0.902	6.011
0.904	6.88
0.906	6.88
0.908	6.446
0.91	5.143
0.912	3.841
0.914	3.407
0.916	2.973
0.918	2.973
0.92	3.407
0.922	3.841
0.924	3.841
0.926	2.973
0.928	1.236
0.93	-0.4998
0.932	-1.802
0.934	-2.67
0.936	-2.67
0.938	-2.67
0.94	-3.538
0.942	-4.407
0.944	-6.143
0.946	-7.445
0.948	-7.879
0.95	-7.879
0.952	-7.445
0.954	-7.011
0.956	-7.879
0.958	-9.182
0.96	-11.35
0.962	-12.65
0.964	-13.52
0.966	-13.09
0.968	-12.65
0.97	-12.22
0.972	-11.79
0.974	-12.22
0.976	-12.22
0.978	-12.22
0.98	-11.35
0.982	-10.48
0.984	-9.616
0.986	-9.182
0.988	-8.747
0.99	-9.182
0.992	-9.182
0.994	-9.616
0.996	-10.05
0.998	-10.92
1	-12.22
1.002	-13.52
1.004	-14.82
1.006	-16.56
1.008	-17.86
1.01	-18.73
1.012	-18.3
1.014	-17.43
1.016	-16.13
1.018	-15.69
1.02	-16.56
1.022	-17.43
1.024	-18.3
1.026	-18.73
1.028	-18.73
1.03	-18.3
1.032	-18.3
1.034	-18.3
1.036	-18.3
1.038	-18.3
1.04	-17.86
1.042	-17
1.044	-16.56
1.046	-16.13
1.048	-15.69
1.05	-14.82
1.052	-14.39
1.054	-13.52
1.056	-13.09
1.058	-12.65
1.06	-12.22
1.062	-11.79
1.064	-11.35
1.066	-11.35
1.068	-11.35
1.07	-11.35
1.072	-11.35
1.074	-10.92
1.076	-10.05
1.078	-9.182
1.08	-9.182
1.082	-9.182
1.084	-8.747
1.086	-8.313
1.088	-7.879
1.09	-7.445
1.092	-7.445
1.094	-7.879
1.096	-7.879
1.098	-7.879
1.1	-7.445
1.102	-7.445
1.104	-7.011
1.106	-7.011
1.108	-7.445
1.11	-7.879
1.112	-8.313
1.114	-8.747
1.116	-8.747
1.118	-9.182
1.12	-9.182
1.122	-9.616
1.124	-9.616
1.126	-9.182
1.128	-7.879
1.13	-7.011
1.132	-6.143
1.134	-6.143
1.136	-6.143
1.138	-6.143
1.14	-6.143
1.142	-5.709
1.144	-5.275
1.146	-4.407
1.148	-3.538
1.15	-2.67
1.152	-1.802
1.154	-1.368
1.156	-0.9339
1.158	-0.9339
1.16	-1.368
1.162	-2.236
1.164	-2.67
1.166	-2.67
1.168	-2.236
1.17	-0.9339
1.172	-0.06575
1.174	-0.4998
1.176	-0.9339
1.178	-0.9339
1.18	0.3683
1.182	1.671
1.184	2.973
1.186	3.841
1.188	3.407
1.19	2.973
1.192	2.539
1.194	2.105
1.196	1.671
1.198	1.671
1.2	2.105
1.202	2.539
1.204	3.407
1.206	3.407
1.208	2.105
1.21	0.8024
1.212	-0.06575
1.214	-0.4998
1.216	-0.06575
1.218	0.8024
1.22	0.8024
1.222	0.3683
1.224	-0.06575
1.226	-0.06575
1.228	0.3683
1.23	0.8024
1.232	0.3683
1.234	-0.06575
1.236	-1.368
1.238	-2.67
1.24	-3.104
1.242	-3.973
1.244	-3.973
1.246	-3.973
1.248	-3.973
1.25	-3.973
1.252	-3.973
1.254	-3.973
1.256	-3.973
1.258	-3.973
1.26	-3.538
1.262	-2.67
1.264	-2.67
1.266	-3.104
1.268	-3.973
1.27	-5.275
1.272	-7.445
1.274	-8.747
1.276	-9.616
1.278	-10.48
1.28	-10.48
1.282	-10.48
1.284	-10.92
1.286	-10.92
1.288	-11.35
1.29	-10.92
1.292	-10.48
1.294	-10.05
1.296	-10.05
1.298	-9.616
1.3	-9.182
1.302	-8.747
1.304	-7.879
1.306	-7.011
1.308	-7.445
1.31	-8.313
1.312	-9.616
1.314	-10.92
1.316	-10.92
1.318	-10.48
1.32	-9.616
1.322	-9.182
1.324	-9.182
1.326	-9.182
1.328	-8.747
1.33	-8.747
1.332	-8.313
1.334	-8.747
1.336	-9.616
1.338	-10.05
1.34	-10.05
1.342	-9.182
1.344	-7.879
1.346	-7.011
1.348	-7.011
1.35	-7.011
1.352	-7.011
1.354	-6.577
1.356	-6.143
1.358	-5.709
1.36	-5.709
1.362	-5.709
1.364	-6.143
1.366	-6.143
1.368	-6.577
1.37	-7.011
1.372	-6.577
1.374	-6.577
1.376	-5.709
1.378	-5.275
1.38	-5.275
1.382	-5.275
1.384	-5.709
1.386	-5.709
1.388	-5.275
1.39	-5.275
1.392	-4.841
1.394	-4.841
1.396	-4.841
1.398	-4.407
1.4	-3.973
1.402	-3.104
1.404	-2.67
1.406	-1.802
1.408	-1.368
1.41	-1.368
1.412	-1.802
1.414	-2.67
1.416	-3.104
1.418	-3.538
1.42	-3.104
1.422	-2.236
1.424	-0.9339
1.426	0.3683
1.428	1.671
1.43	2.539
1.432	2.973
1.434	3.407
1.436	3.841
1.438	4.275
1.44	4.275
1.442	4.709
1.444	5.143
1.446	4.709
1.448	4.709
1.45	4.275
1.452	4.275
1.454	5.143
1.456	5.577
1.458	6.446
1.46	6.88
1.462	7.748
1.464	8.182
1.466	8.182
1.468	7.748
1.47	8.182
1.472	8.616
1.474	9.918
1.476	11.22
1.478	12.09
1.48	12.52
1.482	12.52
1.484	12.96
1.486	13.39
1.488	13.82
1.49	14.26
1.492	14.69
1.494	14.26
1.496	13.82
1.498	13.39
1.5	12.52
1.502	11.65
1.504	11.22
1.506	10.79
1.508	11.22
1.51	11.22
1.512	11.22
1.514	11.22
1.516	10.79
1.518	10.79
1.52	10.79
1.522	10.35
1.524	9.484
1.526	8.616
1.528	7.748
1.53	7.748
1.532	8.182
1.534	9.05
1.536	10.35
1.538	10.79
1.54	11.22
1.542	10.35
1.544	9.918
1.546	8.616
1.548	8.182
1.55	7.314
1.552	7.314
1.554	7.314
1.556	7.748
1.558	7.748
1.56	8.182
1.562	8.182
1.564	8.182
1.566	8.182
1.568	8.616
1.57	9.05
1.572	9.484
1.574	9.484
1.576	8.616
1.578	8.182
1.58	7.314
1.582	7.314
1.584	7.314
1.586	6.88
1.588	6.011
1.59	5.143
1.592	4.275
1.594	3.407
1.596	3.407
1.598	2.973
1.6	2.105
1.602	0.8024
1.604	-0.06575
1.606	-0.9339
1.608	-1.802
1.61	-2.236
1.612	-1.802
1.614	-0.9339
1.616	0.3683
1.618	0.8024
1.62	1.671
1.622	2.105
1.624	2.539
1.626	3.407
1.628	3.841
1.63	3.407
1.632	3.407
1.634	3.841
1.636	5.143
1.638	6.446
1.64	7.314
1.642	6.88
1.644	6.446
1.646	6.88
1.648	8.182
1.65	10.35
1.652	12.09
1.654	12.52
1.656	12.09
1.658	11.65
1.66	11.22
1.662	11.22
1.664	12.09
1.666	12.96
1.668	13.82
1.67	14.26
1.672	14.26
1.674	14.26
1.676	14.69
1.678	15.13
1.68	15.13
1.682	14.26
1.684	13.39
1.686	12.09
1.688	11.65
1.69	11.22
1.692	11.65
1.694	11.65
1.696	11.65
1.698	11.65
1.7	11.65
1.702	12.52
1.704	12.52
1.706	11.65
1.708	9.484
1.71	6.88
1.712	5.143
1.714	4.275
1.716	4.275
1.718	4.709
1.72	4.709
1.722	4.709
1.724	4.275
1.726	2.973
1.728	1.236
1.73	-0.4998
1.732	-1.368
1.734	-1.802
1.736	-0.9339
1.738	-0.4998
1.74	-0.9339
1.742	-1.802
1.744	-3.104
1.746	-3.538
1.748	-2.67
1.75	-1.802
1.752	-0.9339
1.754	-0.9339
1.756	-1.368
1.758	-1.802
1.76	-1.368
1.762	-0.4998
1.764	0.3683
1.766	0.8024
1.768	-0.06575
1.77	-0.9339
1.772	-1.368
1.774	-0.4998
1.776	0.3683
1.778	1.671
1.78	2.105
1.782	2.539
1.784	2.973
1.786	3.841
1.788	4.275
1.79	4.709
1.792	4.709
1.794	4.709
1.796	5.577
1.798	6.011
1.8	6.446
1.802	6.446
1.804	5.577
1.806	5.143
1.808	4.275
1.81	4.275
1.812	4.709
1.814	5.143
1.816	5.577
1.818	5.577
1.82	5.577
1.822	4.709
1.824	4.275
1.826	3.841
1.828	3.407
1.83	2.539
1.832	2.105
1.834	1.671
1.836	1.671
1.838	2.105
1.84	2.105
1.842	2.539
1.844	2.105
1.846	1.236
1.848	1.236
1.85	1.671
1.852	2.105
1.854	2.539
1.856	2.539
1.858	2.539
1.86	2.105
1.862	1.236
1.864	0.8024
1.866	0.3683
1.868	-0.06575
1.87	-0.9339
1.872	-1.802
1.874	-2.67
1.876	-3.973
1.878	-4.841
1.88	-5.709
1.882	-6.143
1.884	-6.577
1.886	-6.577
1.888	-6.577
1.89	-6.577
1.892	-6.577
1.894	-6.143
1.896	-5.709
1.898	-6.143
1.9	-7.011
1.902	-7.879
1.904	-8.747
1.906	-8.313
1.908	-7.879
1.91	-7.445
1.912	-7.445
1.914	-8.747
1.916	-10.05
1.918	-11.35
1.92	-11.79
1.922	-11.79
1.924	-11.35
1.926	-10.92
1.928	-10.48
1.93	-10.48
1.932	-10.92
1.934	-10.92
1.936	-10.48
1.938	-9.616
1.94	-8.313
1.942	-7.011
1.944	-5.709
1.946	-4.841
1.948	-4.407
1.95	-5.275
1.952	-6.577
1.954	-7.879
1.956	-8.747
1.958	-8.747
1.96	-8.313
1.962	-7.879
1.964	-7.445
1.966	-7.011
1.968	-7.011
1.97	-7.445
1.972	-8.313
1.974	-8.747
1.976	-8.747
1.978	-7.879
1.98	-6.577
1.982	-6.143
1.984	-6.143
1.986	-7.011
1.988	-7.445
1.99	-7.011
1.992	-5.709
1.994	-4.407
1.996	-3.973
1.998	-4.407
2	-5.709
2.002	-7.011
2.004	-7.879
2.006	-8.313
2.008	-8.313
2.01	-8.313
2.012	-8.313
2.014	-9.182
2.016	-9.616
2.018	-10.05
2.02	-10.05
2.022	-9.182
2.024	-8.313
2.026	-7.445
2.028	-6.143
2.03	-5.275
2.032	-4.841
2.034	-4.407
2.036	-4.407
2.038	-3.973
2.04	-4.407
2.042	-4.841
2.044	-5.275
2.046	-5.709
2.048	-6.577
2.05	-7.011
2.052	-7.879
2.054	-8.747
2.056	-8.747
2.058	-8.747
2.06	-8.313
2.062	-7.879
2.064	-7.445
2.066	-7.011
2.068	-6.143
2.07	-5.275
2.072	-4.407
2.074	-4.407
2.076	-3.973
2.078	-3.538
2.08	-2.67
2.082	-2.236
2.084	-2.236
2.086	-2.236
2.088	-1.802
2.09	-1.368
2.092	0.3683
2.094	1.671
2.096	2.539
2.098	3.407
2.1	3.841
2.102	4.709
2.104	6.011
2.106	6.011
2.108	5.143
2.11	3.407
2.112	1.671
2.114	1.236
2.116	1.671
2.118	2.973
2.12	3.841
2.122	4.275
2.124	4.275
2.126	3.841
2.128	3.841
2.13	3.841
2.132	3.407
2.134	2.973
2.136	1.671
2.138	0.8024
2.14	0.3683
2.142	0.8024
2.144	2.105
2.146	2.973
2.148	3.407
2.15	2.973
2.152	2.105
2.154	0.8024
2.156	0.3683
2.158	0.3683
2.16	0.3683
2.162	-0.06575
2.164	-0.9339
2.166	-2.67
2.168	-3.538
2.17	-3.973
2.172	-3.104
2.174	-2.67
2.176	-3.104
2.178	-3.973
2.18	-5.709
2.182	-7.445
2.184	-9.182
2.186	-10.48
2.188	-10.92
2.19	-11.35
2.192	-10.92
2.194	-10.48
2.196	-10.48
2.198	-10.92
2.2	-11.35
2.202	-12.65
2.204	-13.96
2.206	-15.26
2.208	-16.56
2.21	-17.43
2.212	-17.86
2.214	-17.43
2.216	-17
2.218	-16.13
2.22	-15.69
2.222	-16.56
2.224	-17.43
2.226	-18.73
2.228	-19.17
2.23	-19.17
2.232	-20.03
2.234	-20.9
2.236	-22.2
2.238	-23.07
2.24	-23.07
2.242	-22.64
2.244	-21.77
2.246	-21.34
2.248	-20.9
2.25	-20.03
2.252	-19.6
2.254	-18.73
2.256	-18.3
2.258	-18.3
2.26	-17.86
2.262	-17
2.264	-16.13
2.266	-15.26
2.268	-14.39
2.27	-13.52
2.272	-12.65
2.274	-12.22
2.276	-11.79
2.278	-11.35
2.28	-10.92
2.282	-10.48
2.284	-9.616
2.286	-8.747
2.288	-8.313
2.29	-8.313
2.292	-7.879
2.294	-7.445
2.296	-6.143
2.298	-4.407
2.3	-2.67
2.302	-1.802
2.304	-0.9339
2.306	-0.4998
2.308	-0.06575
2.31	0.8024
2.312	1.236
2.314	0.8024
2.316	-0.06575
2.318	-0.4998
2.32	-0.06575
2.322	0.8024
2.324	2.539
2.326	3.407
2.328	3.841
2.33	2.973
2.332	2.105
2.334	1.671
2.336	2.105
2.338	3.407
2.34	4.709
2.342	6.011
2.344	6.88
2.346	7.314
2.348	7.314
2.35	7.314
2.352	7.748
2.354	8.616
2.356	9.05
2.358	9.484
2.36	9.05
2.362	7.748
2.364	6.88
2.366	6.88
2.368	6.88
2.37	7.314
2.372	7.748
2.374	7.748
2.376	7.314
2.378	7.314
2.38	7.314
2.382	6.88
2.384	6.011
2.386	5.577
2.388	4.709
2.39	4.275
2.392	3.841
2.394	2.973
2.396	2.105
2.398	0.8024
2.4	0.3683
2.402	-0.06575
2.404	-0.4998
2.406	-0.4998
2.408	-1.368
2.41	-2.236
2.412	-2.67
2.414	-2.67
2.416	-3.104
2.418	-3.538
2.42	-4.407
2.422	-4.841
2.424	-4.407
2.426	-3.538
2.428	-2.67
2.43	-1.368
2.432	-1.368
2.434	-1.802
2.436	-2.67
2.438	-3.973
2.44	-4.841
2.442	-6.143
2.444	-7.445
2.446	-8.747
2.448	-9.182
2.45	-9.182
2.452	-8.313
2.454	-7.445
2.456	-6.577
2.458	-6.143
2.46	-6.143
2.462	-5.709
2.464	-5.275
2.466	-5.275
2.468	-5.709
2.47	-5.709
2.472	-6.143
2.474	-5.709
2.476	-5.709
2.478	-5.709
2.48	-7.011
2.482	-8.313
2.484	-9.616
2.486	-10.05
2.488	-9.616
2.49	-9.616
2.492	-10.05
2.494	-10.92
2.496	-10.92
2.498	-10.48
2.5	-9.182
2.502	-7.879
2.504	-6.577
2.506	-5.709
2.508	-5.709
2.51	-6.143
2.512	-7.879
2.514	-9.182
2.516	-10.05
2.518	-9.616
2.52	-8.313
2.522	-7.011
2.524	-6.577
2.526	-6.577
2.528	-7.011
2.53	-7.011
2.532	-6.143
2.534	-4.407
2.536	-2.67
2.538	-1.368
2.54	-1.368
2.542	-2.236
2.544	-4.407
2.546	-5.709
2.548	-6.143
2.55	-4.841
2.552	-3.538
2.554	-2.67
2.556	-2.236
2.558	-2.67
2.56	-3.104
2.562	-2.236
2.564	-1.368
2.566	-0.4998
2.568	-0.4998
2.57	-1.368
2.572	-2.236
2.574	-2.236
2.576	-1.802
2.578	-0.4998
2.58	0.3683
2.582	0.3683
2.584	-0.06575
2.586	-0.4998
2.588	-0.9339
2.59	-0.9339
2.592	-0.4998
2.594	-0.06575
2.596	-0.06575
2.598	-0.9339
2.6	-1.368
2.602	-2.236
2.604	-2.236
2.606	-2.236
2.608	-2.67
2.61	-3.104
2.612	-3.538
2.614	-4.841
2.616	-5.709
2.618	-6.577
2.62	-7.445
2.622	-7.879
2.624	-7.879
2.626	-7.445
2.628	-7.011
2.63	-7.011
2.632	-7.011
2.634	-7.445
2.636	-7.011
2.638	-5.709
2.64	-4.841
2.642	-4.407
2.644	-4.407
2.646	-5.275
2.648	-5.709
2.65	-6.143
2.652	-5.275
2.654	-3.973
2.656	-2.236
2.658	-0.9339
2.66	-0.4998
2.662	-0.9339
2.664	-2.236
2.666	-3.104
2.668	-3.538
2.67	-3.104
2.672	-1.802
2.674	-0.9339
2.676	-0.4998
2.678	-0.4998
2.68	-0.4998
2.682	-0.9339
2.684	-1.368
2.686	-1.368
2.688	-1.802
2.69	-1.802
2.692	-1.368
2.694	-1.368
2.696	-1.368
2.698	-0.9339
2.7	-0.9339
2.702	-0.4998
2.704	-0.06575
2.706	0.8024
2.708	1.671
2.71	2.105
2.712	2.539
2.714	2.539
2.716	2.973
2.718	4.275
2.72	5.143
2.722	5.143
2.724	4.275
2.726	2.973
2.728	2.105
2.73	2.539
2.732	3.841
2.734	5.143
2.736	5.577
2.738	5.577
2.74	5.143
2.742	5.143
2.744	5.577
2.746	6.011
2.748	6.011
2.75	5.577
2.752	5.143
2.754	4.709
2.756	4.709
2.758	4.275
2.76	3.407
2.762	2.105
2.764	0.8024
2.766	-0.06575
2.768	0.3683
2.77	0.8024
2.772	1.671
2.774	1.671
2.776	1.671
2.778	0.8024
2.78	-0.06575
2.782	-0.9339
2.784	-1.802
2.786	-2.67
2.788	-3.104
2.79	-2.67
2.792	-2.236
2.794	-1.802
2.796	-1.368
2.798	-1.368
2.8	-0.9339
2.802	-0.4998
2.804	0.3683
2.806	0.3683
2.808	0.8024
2.81	0.3683
2.812	-0.4998
2.814	-1.368
2.816	-1.802
2.818	-1.802
2.82	-1.368
2.822	-0.4998
2.824	-0.4998
2.826	-0.9339
2.828	-1.802
2.83	-2.67
2.832	-2.67
2.834	-1.802
2.836	-0.9339
2.838	-0.4998
2.84	-0.06575
2.842	0.3683
2.844	0.8024
2.846	0.8024
2.848	1.236
2.85	1.671
2.852	2.539
2.854	3.407
2.856	5.143
2.858	6.446
2.86	6.88
2.862	6.011
2.864	4.275
2.866	3.407
2.868	3.407
2.87	3.841
2.872	4.709
2.874	5.143
2.876	4.709
2.878	4.275
2.88	4.275
2.882	3.841
2.884	3.407
2.886	2.973
2.888	2.539
2.89	2.539
2.892	2.973
2.894	2.539
2.896	1.671
2.898	0.8024
2.9	-0.4998
2.902	-0.9339
2.904	-0.9339
2.906	-0.9339
2.908	-0.9339
2.91	-1.368
2.912	-1.802
2.914	-2.67
2.916	-3.538
2.918	-4.841
2.92	-6.143
2.922	-7.445
2.924	-8.747
2.926	-9.616
2.928	-10.48
2.93	-10.48
2.932	-10.05
2.934	-9.616
2.936	-9.182
2.938	-9.182
2.94	-10.05
2.942	-10.48
2.944	-10.92
2.946	-10.92
2.948	-10.48
2.95	-10.48
2.952	-10.92
2.954	-11.79
2.956	-12.22
2.958	-12.22
2.96	-11.79
2.962	-10.48
2.964	-9.616
2.966	-8.747
2.968	-8.747
2.97	-8.313
2.972	-8.313
2.974	-8.747
2.976	-9.616
2.978	-10.05
2.98	-10.05
2.982	-9.182
2.984	-7.879
2.986	-7.445
2.988	-8.313
2.99	-10.05
2.992	-11.35
2.994	-11.79
2.996	-11.35
2.998	-10.05
3	-9.616
3.002	-10.05
3.004	-10.92
3.006	-10.92
3.008	-10.05
3.01	-8.313
3.012	-7.011
3.014	-6.577
3.016	-7.879
3.018	-9.182
3.02	-10.48
3.022	-10.48
3.024	-9.616
3.026	-8.747
3.028	-7.879
3.03	-7.879
3.032	-7.879
3.034	-8.747
3.036	-9.182
3.038	-9.182
3.04	-9.182
3.042	-9.182
3.044	-8.313
3.046	-8.313
3.048	-8.313
3.05	-8.747
3.052	-10.48
3.054	-12.22
3.056	-13.96
3.058	-14.39
3.06	-14.39
3.062	-13.09
3.064	-12.22
3.066	-11.79
3.068	-12.22
3.07	-13.09
3.072	-13.52
3.074	-12.22
3.076	-10.48
3.078	-8.747
3.08	-8.313
3.082	-8.747
3.084	-9.616
3.086	-10.05
3.088	-10.05
3.09	-9.182
3.092	-8.747
3.094	-8.313
3.096	-8.313
3.098	-8.747
3.1	-8.747
3.102	-9.182
3.104	-9.182
3.106	-9.182
3.108	-9.182
3.11	-9.182
3.112	-8.747
3.114	-8.313
3.116	-7.879
3.118	-6.577
3.12	-5.709
3.122	-4.841
3.124	-4.407
3.126	-3.973
3.128	-3.538
3.13	-2.67
3.132	-2.67
3.134	-2.67
3.136	-3.104
3.138	-3.973
3.14	-3.538
3.142	-2.67
3.144	-0.9339
3.146	-0.4998
3.148	-0.4998
3.15	-1.802
3.152	-3.538
3.154	-4.407
3.156	-4.407
3.158	-4.407
3.16	-4.407
3.162	-4.407
3.164	-5.275
3.166	-5.275
3.168	-5.275
3.17	-3.973
3.172	-2.67
3.174	-1.802
3.176	-1.368
3.178	-1.802
3.18	-2.236
3.182	-2.236
3.184	-1.802
3.186	-0.9339
3.188	-0.06575
3.19	-0.06575
3.192	-0.4998
3.194	-0.9339
3.196	-0.9339
3.198	-0.9339
3.2	-1.368
3.202	-1.368
3.204	-1.368
3.206	-0.9339
3.208	-0.9339
3.21	-0.4998
3.212	-0.4998
3.214	-0.9339
3.216	-0.9339
3.218	-1.368
3.22	-1.368
3.222	-1.802
3.224	-2.67
3.226	-3.104
3.228	-3.104
3.23	-2.236
3.232	-1.802
3.234	-1.802
3.236	-2.67
3.238	-3.538
3.24	-3.973
3.242	-3.538
3.244	-2.236
3.246	-0.9339
3.248	-0.4998
3.25	-0.9339
3.252	-1.368
3.254	-1.802
3.256	-1.802
3.258	-1.368
3.26	-1.368
3.262	-1.368
3.264	-1.802
3.266	-2.67
3.268	-3.104
3.27	-2.67
3.272	-2.236
3.274	-1.368
3.276	-0.9339
3.278	-1.368
3.28	-2.236
3.282	-3.538
3.284	-3.538
3.286	-2.236
3.288	-0.4998
3.29	1.236
3.292	2.105
3.294	1.236
3.296	-0.06575
3.298	-1.368
3.3	-1.802
3.302	-0.9339
3.304	-0.06575
3.306	0.3683
3.308	0.8024
3.31	0.8024
3.312	0.8024
3.314	1.671
3.316	3.407
3.318	4.275
3.32	4.709
3.322	4.275
3.324	3.407
3.326	2.539
3.328	2.105
3.33	1.671
3.332	2.105
3.334	2.973
3.336	3.407
3.338	3.407
3.34	2.539
3.342	1.671
3.344	1.236
3.346	1.236
3.348	1.671
3.35	2.105
3.352	1.671
3.354	0.8024
3.356	0.3683
3.358	0.3683
3.36	0.8024
3.362	1.236
3.364	1.236
3.366	0.3683
3.368	-1.802
3.37	-3.538
3.372	-4.407
3.374	-4.407
3.376	-3.973
3.378	-3.538
3.38	-3.538
3.382	-4.407
3.384	-5.709
3.386	-7.445
3.388	-8.313
3.39	-8.747
3.392	-8.747
3.394	-8.747
3.396	-8.747
3.398	-8.747
3.4	-8.313
3.402	-7.879
3.404	-7.879
3.406	-8.747
3.408	-10.05
3.41	-10.92
3.412	-10.92
3.414	-10.48
3.416	-9.616
3.418	-9.182
3.42	-9.182
3.422	-9.616
3.424	-9.616
3.426	-9.616
3.428	-9.182
3.43	-8.747
3.432	-7.879
3.434	-7.011
3.436	-5.709
3.438	-4.841
3.44	-3.973
3.442	-3.973
3.444	-3.973
3.446	-3.538
3.448	-3.104
3.45	-2.67
3.452	-2.236
3.454	-1.802
3.456	-1.802
3.458	-2.236
3.46	-2.67
3.462	-2.67
3.464	-1.368
3.466	-0.06575
3.468	1.236
3.47	2.105
3.472	2.105
3.474	1.671
3.476	1.236
3.478	1.236
3.48	1.671
3.482	1.671
3.484	1.671
3.486	1.671
3.488	1.236
3.49	1.236
3.492	0.8024
3.494	0.3683
3.496	-0.4998
3.498	-0.9339
3.5	-0.9339
3.502	-0.4998
3.504	-0.06575
3.506	-0.06575
3.508	-0.4998
3.51	-1.368
3.512	-1.802
3.514	-1.802
3.516	-0.9339
3.518	-0.06575
3.52	0.8024
3.522	1.236
3.524	1.236
3.526	0.8024
3.528	0.3683
3.53	-0.06575
3.532	-0.9339
3.534	-1.368
3.536	-1.802
3.538	-2.236
3.54	-3.104
3.542	-3.538
3.544	-3.973
3.546	-3.973
3.548	-3.104
3.55	-3.104
3.552	-3.538
3.554	-4.841
3.556	-6.143
3.558	-6.577
3.56	-5.709
3.562	-4.407
3.564	-2.67
3.566	-1.802
3.568	-0.9339
3.57	-0.06575
3.572	-0.06575
3.574	-0.06575
3.576	-0.4998
3.578	-1.368
3.58	-2.236
3.582	-2.236
3.584	-1.802
3.586	-0.9339
3.588	-0.4998
3.59	-0.06575
3.592	-0.06575
3.594	-0.4998
3.596	-1.368
3.598	-2.236
3.6	-3.104
3.602	-3.538
3.604	-3.973
3.606	-4.407
3.608	-4.407
3.61	-3.973
3.612	-3.538
3.614	-3.104
3.616	-2.236
3.618	-1.802
3.62	-1.368
3.622	-0.9339
3.624	-0.9339
3.626	-0.9339
3.628	-0.9339
3.63	-1.368
3.632	-1.368
3.634	-1.368
3.636	-0.4998
3.638	0.8024
3.64	1.671
3.642	1.236
3.644	0.3683
3.646	-0.9339
3.648	-1.802
3.65	-2.236
3.652	-2.236
3.654	-2.67
3.656	-3.104
3.658	-3.538
3.66	-4.407
3.662	-5.275
3.664	-6.577
3.666	-7.879
3.668	-8.747
3.67	-8.747
3.672	-8.313
3.674	-7.445
3.676	-7.445
3.678	-7.445
3.68	-7.879
3.682	-8.313
3.684	-9.182
3.686	-10.48
3.688	-12.22
3.69	-13.96
3.692	-13.96
3.694	-13.09
3.696	-10.92
3.698	-9.616
3.7	-9.182
3.702	-10.05
3.704	-10.92
3.706	-10.92
3.708	-10.05
3.71	-8.313
3.712	-7.011
3.714	-6.577
3.716	-6.577
3.718	-7.011
3.72	-7.011
3.722	-6.577
3.724	-6.143
3.726	-6.143
3.728	-6.577
3.73	-7.011
3.732	-7.011
3.734	-7.011
3.736	-6.577
3.738	-6.143
3.74	-5.275
3.742	-4.841
3.744	-4.841
3.746	-5.275
3.748	-5.709
3.75	-6.143
3.752	-5.709
3.754	-5.275
3.756	-5.275
3.758	-5.709
3.76	-6.577
3.762	-7.445
3.764	-7.879
3.766	-7.879
3.768	-7.879
3.77	-8.313
3.772	-8.747
3.774	-8.747
3.776	-8.313
3.778	-7.011
3.78	-5.709
3.782	-4.841
3.784	-4.841
3.786	-5.709
3.788	-6.577
3.79	-6.577
3.792	-6.143
3.794	-5.275
3.796	-4.407
3.798	-3.104
3.8	-2.67
3.802	-2.67
3.804	-3.104
3.806	-4.407
3.808	-5.275
3.81	-6.143
3.812	-5.709
3.814	-5.275
3.816	-4.841
3.818	-4.841
3.82	-4.841
3.822	-4.841
3.824	-4.841
3.826	-4.841
3.828	-4.841
3.83	-5.275
3.832	-5.709
3.834	-6.143
3.836	-7.011
3.838	-7.011
3.84	-6.577
3.842	-5.709
3.844	-4.841
3.846	-4.841
3.848	-5.709
3.85	-6.143
3.852	-6.577
3.854	-6.143
3.856	-5.709
3.858	-4.407
3.86	-2.67
3.862	-0.9339
3.864	0.3683
3.866	0.8024
3.868	0.8024
3.87	0.8024
3.872	0.3683
3.874	0.8024
3.876	1.236
3.878	2.105
3.88	3.407
3.882	4.709
3.884	6.011
3.886	6.88
3.888	7.748
3.89	8.182
3.892	8.182
3.894	7.748
3.896	7.748
3.898	8.182
3.9	9.05
3.902	10.35
3.904	11.65
3.906	12.52
3.908	12.09
3.91	11.65
3.912	10.79
3.914	10.79
3.916	11.22
3.918	11.22
3.92	10.79
3.922	9.484
3.924	8.182
3.926	7.314
3.928	7.748
3.93	8.616
3.932	9.484
3.934	9.484
3.936	8.182
3.938	7.314
3.94	6.446
3.942	6.011
3.944	5.577
3.946	5.143
3.948	4.709
3.95	4.275
3.952	4.275
3.954	5.143
3.956	6.446
3.958	6.88
3.96	6.011
3.962	4.709
3.964	2.973
3.966	0.8024
3.968	-1.368
3.97	-2.236
3.972	-2.67
3.974	-2.67
3.976	-3.104
3.978	-3.538
3.98	-3.973
3.982	-4.407
3.984	-4.407
3.986	-3.973
3.988	-3.973
3.99	-3.538
3.992	-3.973
3.994	-3.973
3.996	-3.973
[truncated: 8,002 more rows]

## Sheet: Sheet2
Measured signal in the working section of turning
Time (s)	Microstrain (me)
0.002	7.83755
0.004	11.912
0.006	-1.50275
0.008	8.10836
0.01	6.2912
0.012	1.31288
0.014	4.57332
0.016	7.3666
0.018	17.8831
0.02	15.2155
0.022	1.94619
0.024	15.9121
0.026	8.43879
0.028	5.83684
0.03	8.09727
0.032	4.92129
0.034	5.02644
0.036	10.2717
0.038	10.244
0.04	10.5775
0.042	8.41984
0.044	2.70961
0.046	9.0274
0.048	12.105
0.05	8.4498
0.052	9.96723
0.054	8.52038
0.056	4.7596
0.058	6.21148
0.06	2.44161
0.062	7.73127
0.064	1.3662
0.066	1.92402
0.068	2.98522
0.07	-3.62108
0.072	10.4916
0.074	7.08023
0.076	3.77475
0.078	10.5041
0.08	0.480655
0.082	5.25027
0.084	4.49707
0.086	6.21577
0.088	6.34913
0.09	3.03839
0.092	6.17307
0.094	6.1255
0.096	8.89436
0.098	10.3854
0.1	10.2829
0.102	3.73393
0.104	6.51706
0.106	1.99678
0.108	1.85794
0.11	4.78732
0.112	9.25657
0.114	1.80642
0.116	5.69125
0.118	4.2405
0.12	9.07929
0.122	2.39727
0.124	6.21989
0.126	7.88514
0.128	9.56358
0.13	10.7537
0.132	5.69922
0.134	0.109158
0.136	2.20144
0.138	1.10207
0.14	12.1831
0.142	2.91459
0.144	7.43557
0.146	4.42356
0.148	7.96249
0.15	2.74399
0.152	0.779442
0.154	0.638204
0.156	6.2959
0.158	3.54959
0.16	3.02871
0.162	7.97151
0.164	4.51356
0.166	4.44378
0.168	9.12555
0.17	1.46444
0.172	6.11812
0.174	6.40787
0.176	2.87606
0.178	4.27044
0.18	-0.307667
0.182	-0.557749
0.184	3.07031
0.186	4.89383
0.188	10.861
0.19	0.521824
0.192	3.41123
0.194	2.62394
0.196	-3.22569
0.198	1.55915
0.2	-2.78263
0.202	5.57951
0.204	-0.186401
0.206	2.44024
0.208	-0.315822
0.21	1.78537
0.212	-1.64719
0.214	1.69087
0.216	2.48959
0.218	5.68103
0.22	-0.423139
0.222	-6.72655
0.224	-2.64399
0.226	4.38307
0.228	-3.31196
0.23	3.1224
0.232	0.134768
0.234	3.80072
0.236	-7.54145
0.238	-2.12518
0.24	-5.12973
0.242	8.51272
0.244	2.38032
0.246	4.53799
0.248	-3.19035
0.25	-1.30222
0.252	-0.827739
0.254	3.40898
0.256	-1.15242
0.258	1.67685
0.26	-7.52523
0.262	-2.54842
0.264	-4.36017
0.266	-6.77323
0.268	0.1348
0.27	-0.20473
0.272	-0.693205
0.274	-4.84111
0.276	3.041
0.278	0.397897
0.28	-1.9119
0.282	-1.34188
0.284	-2.79217
0.286	-8.01938
0.288	-3.48268
0.29	-5.0767
0.292	-5.08909
0.294	-5.19551
0.296	-2.97026
0.298	-7.52142
0.3	2.13391
0.302	0.941955
0.304	-0.634033
0.306	-0.83494
0.308	-3.74084
0.31	1.53986
0.312	-2.61028
0.314	-4.54883
0.316	2.22114
0.318	-2.67295
0.32	-3.83952
0.322	-3.04756
0.324	-5.05288
0.326	-6.07832
0.328	5.59871
0.33	2.81085
0.332	-1.73665
0.334	-7.05496
0.336	-6.10805
0.338	-4.13221
0.34	-1.10912
0.342	-7.83271
0.344	-11.0284
0.346	-8.05402
0.348	-2.19137
0.35	-1.77559
0.352	-1.4287
0.354	-3.29249
0.356	-2.5175
0.358	-4.93808
0.36	-1.11353
0.362	-8.6194
0.364	-3.03172
0.366	-7.20705
0.368	-5.33096
0.37	-2.18074
0.372	-0.392761
0.374	-7.14618
0.376	0.701055
0.378	-1.06846
0.38	-3.32312
0.382	-3.80784
0.384	-4.26375
0.386	-5.15234
0.388	-4.64572
0.39	-4.7858
0.392	-2.07399
0.394	0.554976
0.396	-2.45574
0.398	-4.54585
0.4	-1.872
0.402	-3.36427
0.404	-7.24899
0.406	-0.834264
0.408	-2.89084
0.41	-3.51816
0.412	-2.53149
0.414	-3.49812
0.416	-7.35049
0.418	-4.54782
0.42	-4.11145
0.422	-4.96328
0.424	2.43499
0.426	-5.44931
0.428	-4.04048
0.43	-4.69443
0.432	-6.32838
0.434	-3.56775
0.436	-4.21405
0.438	1.41019
0.44	-4.13384
0.442	-6.36032
0.444	2.56735
0.446	1.69368
0.448	-2.84219
0.45	-6.85355
0.452	-3.22337
0.454	-1.99145
0.456	-0.377366
0.458	-2.17474
0.46	-0.302471
0.462	-0.928563
0.464	-6.41958
0.466	-5.29641
0.468	-4.09602
0.47	-2.88783
0.472	-2.05763
0.474	-1.06787
0.476	-10.9627
0.478	-2.80197
0.48	2.79439
0.482	-4.52401
0.484	1.80569
0.486	-0.3701
0.488	-1.89231
0.49	-1.29194
0.492	-6.73479
0.494	-1.68593
0.496	4.18266
0.498	-0.254925
0.5	-0.206855
0.502	-2.46006
0.504	-0.0538157
0.506	0.865824
0.508	1.41041
0.51	-1.37962
0.512	-1.32716
0.514	5.52693
0.516	-8.41722
0.518	6.03218
0.52	0.126959
0.522	2.40235
0.524	-6.05321
0.526	-2.61322
0.528	-1.53726
0.53	0.783891
0.532	-5.76516
0.534	0.940557
0.536	-4.76152
0.538	-1.12636
0.54	0.366658
0.542	-0.67513
0.544	2.12888
0.546	2.49847
0.548	-2.19341
0.55	1.0218
0.552	-2.82589
0.554	-4.18827
0.556	2.85301
0.558	-0.262353
0.56	-0.66893
0.562	2.11754
0.564	0.565862
0.566	-0.754709
0.568	1.89724
0.57	1.02463
0.572	-0.801015
0.574	-3.2419
0.576	-2.88708
0.578	3.01738
0.58	-6.11614
0.582	-1.26299
0.584	-7.73338
0.586	1.39197
0.588	0.499237
0.59	-2.56414
0.592	-2.79473
0.594	-10.2999
0.596	-0.0918487
0.598	-8.74403
0.6	-9.15026
0.602	-1.54342
0.604	-4.837
0.606	-0.251044
0.608	0.676047
0.61	1.17808
0.612	-4.1666
0.614	-0.975002
0.616	-2.24558
0.618	0.308232
0.62	-0.236014
0.622	1.22984
0.624	-1.99142
0.626	-2.19399
0.628	1.35122
0.63	-8.67745
0.632	-3.41539
0.634	-6.02229
0.636	-3.4089
0.638	-0.413567
0.64	-0.0770909
0.642	-6.12569
0.644	-4.38388
0.646	-2.28272
0.648	-3.34889
0.65	-1.14019
0.652	-0.441755
0.654	-4.31662
0.656	-1.75097
0.658	-7.93602
0.66	2.48347
0.662	-3.4299
0.664	-5.578
0.666	-2.76638
0.668	-6.68216
0.67	-2.09675
0.672	-3.59499
0.674	5.40564
0.676	2.07716
0.678	-9.56537
0.68	-0.0786455
0.682	-5.73915
0.684	-1.77095
0.686	-0.427599
0.688	0.979494
0.69	-2.9044
0.692	2.48037
0.694	-4.10811
0.696	-0.981062
0.698	0.790525
0.7	-0.527604
0.702	2.17459
0.704	0.311535
0.706	-3.23488
0.708	-6.4286
0.71	5.45926
0.712	-2.50595
0.714	-0.469409
0.716	0.618938
0.718	-1.05138
0.72	-4.23581
0.722	-2.6057
0.724	-1.2004
0.726	4.1666
0.728	-3.17304
0.73	2.25046
0.732	0.802725
0.734	-1.08831
0.736	-4.03178
0.738	-2.01779
0.74	-1.69282
0.742	-6.12105
0.744	-0.569173
0.746	-3.43389
0.748	-0.794861
0.75	0.891085
0.752	-2.92921
0.754	-0.724608
0.756	1.5502
0.758	-5.29671
0.76	3.90058
0.762	8.11679
0.764	3.11743
0.766	-1.19695
0.768	1.18703
0.77	-3.27296
0.772	6.44312
0.774	3.74916
0.776	3.33486
0.778	-1.99174
0.78	1.76114
0.782	-1.12836
0.784	-0.337751
0.786	-1.16588
0.788	-2.70222
0.79	-2.4044
0.792	-0.243121
0.794	-5.01166
0.796	2.45183
0.798	0.436059
0.8	3.35982
0.802	2.29165
0.804	3.24161
0.806	-2.93752
0.808	-1.37834
0.81	0.534453
0.812	2.24034
0.814	5.27349
0.816	0.499447
0.818	5.23777
0.82	2.79698
0.822	5.34198
0.824	2.29571
0.826	0.016174
0.828	-2.54778
0.83	2.61765
0.832	4.74116
0.834	1.18264
0.836	0.310923
0.838	0.900696
0.84	-1.93017
0.842	-0.227673
0.844	0.849245
0.846	1.88227
0.848	2.0691
0.85	4.76914
0.852	3.54561
0.854	9.23559
0.856	4.57902
0.858	9.43563
0.86	1.26388
0.862	5.11236
0.864	2.36204
0.866	4.88699
0.868	4.63656
0.87	-4.42017
0.872	-1.74606
0.874	-2.03422
0.876	4.09823
0.878	7.82711
0.88	2.30255
0.882	6.10443
0.884	5.25003
0.886	-0.0187393
0.888	4.2379
0.89	0.249591
0.892	7.20619
0.894	2.16908
0.896	7.66649
0.898	1.45
0.9	5.08322
0.902	3.22495
0.904	-2.9726
0.906	0.434378
0.908	5.6182
0.91	3.71134
0.912	0.457973
0.914	1.95793
0.916	4.53253
0.918	0.24582
0.92	6.54841
0.922	1.75835
0.924	10.1412
0.926	1.42774
0.928	5.83141
0.93	0.24542
0.932	2.7223
0.934	3.06301
0.936	6.32511
0.938	8.1339
0.94	6.07897
0.942	3.845
0.944	7.57462
0.946	7.5983
0.948	5.57845
0.95	7.33033
0.952	6.97657
0.954	2.57057
0.956	8.16398
0.958	3.7035
0.96	4.02783
0.962	6.52862
0.964	4.74659
0.966	4.92501
0.968	6.86963
0.97	8.08499
0.972	4.09843
0.974	5.93552
0.976	4.4303
0.978	6.23617
0.98	7.14053
0.982	4.06321
0.984	7.22635
0.986	8.57862
0.988	7.1797
0.99	12.5009
0.992	4.85827
0.994	4.29304
0.996	1.0494
0.998	9.95366
1	10.5063
1.002	8.16511
1.004	11.7595
1.006	9.54722
1.008	9.81333
1.01	9.16691
1.012	10.2142
1.014	9.13078
1.016	17.655
1.018	4.76147
1.02	2.25189
1.022	4.38362
1.024	4.68891
1.026	7.18599
1.028	8.57304
1.03	8.87378
1.032	11.5379
1.034	11.2045
1.036	12.3637
1.038	15.6529
1.04	13.7211
1.042	5.46391
1.044	1.88444
1.046	12.2316
1.048	3.84855
1.05	10.5559
1.052	11.0705
1.054	18.3969
1.056	10.9657
1.058	9.40896
1.06	11.7121
1.062	11.8978
1.064	11.4117
1.066	9.23836
1.068	7.0414
1.07	11.8168
1.072	6.50252
1.074	7.72804
1.076	15.6813
1.078	10.3837
1.08	11.4296
1.082	14.8376
1.084	11.1484
1.086	15.5599
1.088	11.3887
1.09	15.7373
1.092	14.4324
1.094	11.4273
1.096	9.18337
1.098	8.6152
1.1	11.3983
1.102	11.1674
1.104	11.646
1.106	16.4121
1.108	12.5393
1.11	17.3092
1.112	11.9439
1.114	16.5306
1.116	11.3591
1.118	13.0593
1.12	15.1416
1.122	10.3227
1.124	10.0912
1.126	17.834
1.128	14.6173
1.13	10.2649
1.132	13.8036
1.134	10.649
1.136	14.1397
1.138	16.5671
1.14	6.97093
1.142	15.4045
1.144	16.6251
1.146	11.8005
1.148	17.0873
1.15	12.1461
1.152	8.07071
1.154	5.46891
1.156	11.8102
1.158	15.3169
1.16	14.125
1.162	14.4331
1.164	11.1835
1.166	13.4928
1.168	7.63001
1.17	10.2132
1.172	9.79466
1.174	13.8509
1.176	12.141
1.178	8.63939
1.18	12.6938
1.182	10.9762
1.184	11.3576
1.186	16.4139
1.188	14.0097
1.19	14.6148
1.192	15.709
1.194	12.8405
1.196	13.4126
1.198	13.5283
1.2	15.1669
1.202	13.2493
1.204	16.7092
1.206	12.4125
1.208	12.0331
1.21	17.174
1.212	9.40131
1.214	10.333
1.216	12.7501
1.218	9.82289
1.22	13.5352
1.222	12.1939
1.224	9.81582
1.226	6.46824
1.228	10.8506
1.23	4.60777
1.232	9.89553
1.234	11.7785
1.236	10.0254
1.238	12.3909
1.24	16.3339
1.242	12.84
1.244	10.7359
1.246	12.0129
1.248	11.7048
1.25	6.6695
1.252	10.0075
1.254	15.4938
1.256	11.2015
1.258	12.7453
1.26	7.19554
1.262	10.2413
1.264	11.7267
1.266	5.05959
1.268	9.91839
1.27	7.37754
1.272	4.18251
1.274	6.53334
1.276	0.349927
1.278	-0.315179
1.28	2.96119
1.282	3.78865
1.284	3.43472
1.286	1.973
1.288	8.80613
1.29	3.16177
1.292	8.92765
1.294	11.0953
1.296	8.41384
1.298	8.48863
1.3	7.0562
1.302	3.74942
1.304	8.74171
1.306	12.3434
1.308	15.0637
1.31	8.19588
1.312	4.28516
1.314	9.72217
1.316	10.0102
1.318	7.6173
1.32	4.28041
1.322	14.0588
1.324	-0.211432
1.326	5.55823
1.328	3.03568
1.33	5.46158
1.332	8.74732
1.334	8.40201
1.336	5.60687
1.338	10.1409
1.34	9.26157
1.342	8.80368
1.344	4.7525
1.346	8.70534
1.348	6.84839
1.35	12.3827
1.352	7.67716
1.354	8.13017
1.356	4.82524
1.358	0.606248
1.36	3.38986
1.362	2.07499
1.364	2.69572
1.366	6.51029
1.368	3.17982
1.37	2.09627
1.372	3.42151
1.374	3.90978
1.376	5.58227
1.378	1.29729
1.38	5.51812
1.382	4.75175
1.384	8.43596
1.386	3.05073
1.388	2.91852
1.39	-0.786389
1.392	-1.77882
1.394	3.19096
1.396	0.936448
1.398	2.81083
1.4	-1.96866
1.402	6.92549
1.404	1.35846
1.406	4.47391
1.408	0.393967
1.41	0.446582
1.412	2.86958
1.414	2.20895
1.416	-3.38915
1.418	-4.94056
1.42	-3.70168
1.422	-4.95034
1.424	-0.609647
1.426	-2.50172
1.428	-2.74746
1.43	-6.08117
1.432	0.697219
1.434	-0.469006
1.436	-2.39382
1.438	0.856244
1.44	-5.59739
1.442	-1.93135
1.444	-2.68147
1.446	-3.21678
1.448	-7.13184
1.45	-3.90332
1.452	-6.44532
1.454	-7.20624
1.456	-7.65095
1.458	-0.0894643
1.46	-5.96868
1.462	-3.73639
1.464	-7.13028
1.466	-4.21104
1.468	-13.6103
1.47	-6.89424
1.472	-8.36567
1.474	-7.66101
1.476	-5.78675
1.478	-6.83731
1.48	0.0475216
1.482	-8.08758
1.484	-6.90348
1.486	-11.0518
1.488	-7.70844
1.49	-10.8488
1.492	-6.77415
1.494	-4.36964
1.496	-5.80706
1.498	-9.42236
1.5	-12.4774
1.502	-2.81013
1.504	-1.15104
1.506	-7.33057
1.508	-10.733
1.51	-3.64998
1.512	-9.38398
1.514	-9.14424
1.516	-4.87778
1.518	-12.1528
1.52	-13.9832
1.522	-6.67658
1.524	-7.35522
1.526	-9.02552
1.528	-8.12377
1.53	-6.17164
1.532	-6.22228
1.534	-10.9206
1.536	-6.65937
1.538	-9.00592
1.54	-11.564
1.542	-13.9203
1.544	-8.0267
1.546	-11.308
1.548	-10.1805
1.55	-13.0992
1.552	-15.6022
1.554	-9.93338
1.556	-10.4514
1.558	-6.25869
1.56	-7.4543
1.562	-6.64853
1.564	-12.497
1.566	-13.1742
1.568	-14.4704
1.57	-9.11861
1.572	-2.24224
1.574	-9.38231
1.576	-14.803
1.578	-10.1857
1.58	-16.7861
1.582	-17.8882
1.584	-11.1053
1.586	-15.8175
1.588	-12.2373
1.59	-8.66793
1.592	-11.6573
1.594	-9.73409
1.596	-17.7773
1.598	-10.5928
1.6	-6.17005
1.602	-11.5931
1.604	-18.4146
1.606	-13.9768
1.608	-14.5431
1.61	-11.2542
1.612	-10.9308
1.614	-11.0286
1.616	-13.7996
1.618	-14.8612
1.62	-15.1375
1.622	-10.6695
1.624	-19.568
1.626	-14.6817
1.628	-13.6129
1.63	-16.9536
1.632	-13.2579
1.634	-14.7072
1.636	-17.0228
1.638	-13.1936
1.64	-14.4924
1.642	-15.023
1.644	-16.0653
1.646	-13.6673
1.648	-19.9302
1.65	-15.524
1.652	-16.3733
1.654	-17.7835
1.656	-12.8496
1.658	-16.9841
1.66	-12.44
1.662	-10.7389
1.664	-14.2128
1.666	-12.7439
1.668	-11.4317
1.67	-13.4318
1.672	-11.2098
1.674	-16.9854
1.676	-9.69309
1.678	-16.8027
1.68	-19.7979
1.682	-9.50695
1.684	-14.065
1.686	-12.5032
1.688	-15.3348
1.69	-17.6705
1.692	-24.474
1.694	-12.7037
1.696	-15.6275
1.698	-15.4951
1.7	-13.8715
1.702	-20.1003
1.704	-18.1982
1.706	-12.4182
1.708	-14.1779
1.71	-20.0423
1.712	-22.7645
1.714	-17.3073
1.716	-14.4851
1.718	-11.845
1.72	-14.2555
1.722	-17.9963
1.724	-13.4983
1.726	-18.5407
1.728	-18.1712
1.73	-17.4946
1.732	-19.4151
1.734	-16.2688
1.736	-18.2831
1.738	-16.2391
1.74	-16.8051
1.742	-16.6365
1.744	-16.7831
1.746	-11.067
1.748	-12.8317
1.75	-14.5202
1.752	-19.5611
1.754	-20.3004
1.756	-21.5396
1.758	-6.82709
1.76	-11.6721
1.762	-13.5021
1.764	-17.061
1.766	-17.4586
1.768	-12.0334
1.77	-8.85176
1.772	-19.364
1.774	-15.3802
1.776	-14.2109
1.778	-20.3973
1.78	-11.5541
1.782	-15.8068
1.784	-8.27808
1.786	-15.3465
1.788	-12.2463
1.79	-16.6775
1.792	-14.6357
1.794	-16.147
1.796	-11.1468
1.798	-8.23478
1.8	-14.4589
1.802	-11.3139
1.804	-14.7109
1.806	-13.076
1.808	-9.80245
1.81	-13.1715
1.812	-16.6467
1.814	-15.7637
1.816	-13.3323
1.818	-13.3252
1.82	-15.2537
1.822	-11.5181
1.824	-7.65625
1.826	-12.44
1.828	-12.4444
1.83	-19.2241
1.832	-14.8845
1.834	-16.8661
1.836	-13.4104
1.838	-10.2597
1.84	-6.98771
1.842	-6.18313
1.844	-12.471
1.846	-13.2758
1.848	-9.70901
1.85	-10.7574
1.852	-9.8764
1.854	-9.83467
1.856	-17.068
1.858	-10.6735
1.86	-12.5435
1.862	-14.3777
1.864	-13.78
1.866	-7.07053
1.868	-13.4604
1.87	-14.5976
1.872	-9.79535
1.874	-3.96638
1.876	-10.4011
1.878	-9.87976
1.88	-14.333
1.882	-6.3506
1.884	-11.389
1.886	-9.70734
1.888	-13.8394
1.89	-7.44037
1.892	-8.62187
1.894	-13.4935
1.896	-9.66402
1.898	-11.0038
1.9	-8.74981
1.902	-9.67157
1.904	-9.70787
1.906	-12.8688
1.908	-11.0572
1.91	-7.64381
1.912	-4.05014
1.914	-12.6627
1.916	-0.871063
1.918	-3.44384
1.92	-7.86842
1.922	-9.44957
1.924	-10.6456
1.926	-5.74106
1.928	-10.6326
1.93	-10.1947
1.932	-6.19298
1.934	-7.93408
1.936	-6.53516
1.938	-7.56009
1.94	-9.99937
1.942	-9.97688
1.944	-5.55027
1.946	-10.1734
1.948	-4.22348
1.95	-5.56841
1.952	-7.2561
1.954	-8.24406
1.956	-7.23716
1.958	2.8864
1.96	-8.61448
1.962	-12.8553
1.964	-1.27582
1.966	-4.99494
1.968	-8.6388
1.97	2.04897
1.972	-4.18458
1.974	-4.54576
1.976	-7.51801
1.978	-8.2069
1.98	-10.5367
1.982	-6.53503
1.984	-8.78378
1.986	-3.33664
1.988	-6.35151
1.99	0.484754
1.992	-0.265978
1.994	-4.65534
1.996	-6.23986
1.998	-1.95175
2	-9.54399
2.002	-3.94516
2.004	-8.47616
2.006	-7.76903
2.008	-8.71531
2.01	-4.7203
2.012	-8.97887
2.014	-9.58572
2.016	-4.02439
2.018	-6.69035
2.02	-3.86889
2.022	-5.84648
2.024	-3.77945
2.026	-12.8555
2.028	-3.15071
2.03	1.21666
2.032	-1.46795
2.034	-2.03283
2.036	-5.79466
2.038	-4.3704
2.04	-3.7836
2.042	-3.71921
2.044	-6.0728
2.046	-4.15705
2.048	-3.35813
2.05	-4.1072
2.052	0.265868
2.054	5.8688
2.056	-6.57542
2.058	-2.08
2.06	-7.41774
2.062	1.29615
2.064	1.79381
2.066	-7.81545
2.068	3.96433
2.07	-5.73432
2.072	-1.76461
2.074	0.644172
2.076	-2.71124
2.078	3.93891
2.08	5.3253
2.082	-3.20072
2.084	-9.98177
2.086	-5.35053
2.088	-7.12829
2.09	-6.70764
2.092	-7.40892
2.094	-2.77853
2.096	4.33249
2.098	-4.24567
2.1	-2.62094
2.102	2.09001
2.104	2.31529
2.106	0.0629538
2.108	1.79387
2.11	1.29654
2.112	-2.71465
2.114	0.112069
2.116	-1.83526
2.118	-3.37495
2.12	1.77031
2.122	0.0303587
2.124	-0.784937
2.126	0.902305
2.128	3.28489
2.13	1.45696
2.132	0.667935
2.134	0.556678
2.136	-0.63639
2.138	-3.51126
2.14	1.48877
2.142	3.71172
2.144	-2.43408
2.146	5.45023
2.148	-1.44172
2.15	-1.81159
2.152	-4.0593
2.154	-3.79902
2.156	-4.46717
2.158	-0.35862
2.16	3.62258
2.162	0.350926
2.164	1.70469
2.166	3.65064
2.168	-8.19064
2.17	-0.338065
2.172	1.55965
2.174	2.95669
2.176	-3.36558
2.178	-2.33122
2.18	3.34555
2.182	0.363143
2.184	2.20041
2.186	-2.87799
2.188	-5.34121
2.19	2.25214
2.192	3.78969
2.194	5.50221
2.196	-4.32419
2.198	-3.54491
2.2	-3.9068
2.202	0.679888
2.204	-1.31159
2.206	4.71463
2.208	-4.53826
2.21	-5.84253
2.212	-0.0660765
2.214	2.94319
2.216	-3.29469
2.218	-4.46951
2.22	-0.510224
2.222	-4.96546
2.224	0.33095
2.226	2.85154
2.228	0.742194
2.23	-6.1465
2.232	-1.82804
2.234	-1.2298
2.236	5.39195
2.238	2.20631
2.24	-1.13692
2.242	3.31607
2.244	-3.91575
2.246	-1.30102
2.248	4.72241
2.25	5.2406
2.252	2.84503
2.254	1.92392
2.256	-1.67856
2.258	2.35363
2.26	-2.91475
2.262	1.3469
2.264	0.332729
2.266	3.15568
2.268	-1.78008
2.27	1.77478
2.272	2.4314
2.274	-2.83226
2.276	0.6221
2.278	5.46759
2.28	0.866036
2.282	-0.251925
2.284	2.19896
2.286	-0.298251
2.288	1.69461
2.29	-0.386729
2.292	0.0630152
2.294	1.82797
2.296	4.86887
2.298	2.02995
2.3	5.70818
2.302	-6.2206
2.304	-1.31707
2.306	0.877501
2.308	-2.47615
2.31	-3.73411
2.312	2.4052
2.314	2.39132
2.316	1.35586
2.318	1.77197
2.32	-2.05158
2.322	-0.626882
2.324	0.855918
2.326	-1.00529
2.328	2.18358
2.33	8.54184
2.332	-0.577377
2.334	2.96367
2.336	-2.57636
2.338	4.64229
2.34	-3.13573
2.342	0.329072
2.344	-2.47415
2.346	1.30042
2.348	0.00438557
2.35	0.211371
2.352	10.0275
2.354	-1.35815
2.356	0.586338
2.358	9.32909
2.36	-3.01275
2.362	2.27696
2.364	-3.24889
2.366	3.34558
2.368	1.17066
2.37	2.59442
2.372	0.0739314
2.374	2.13648
2.376	6.22077
2.378	-5.85813
2.38	-3.95637
2.382	2.45127
2.384	-0.976255
2.386	0.0179272
2.388	-4.05754
2.39	-2.54556
2.392	-1.24956
2.394	-2.35641
2.396	-2.65328
2.398	-0.845063
2.4	-2.20565
2.402	5.26451
2.404	-2.19854
2.406	6.71228
2.408	-0.385847
2.41	-3.91285
2.412	-1.3986
2.414	3.42191
2.416	3.58026
2.418	0.481164
2.42	0.888447
2.422	2.22549
2.424	-4.32046
2.426	-1.35704
2.428	-5.20158
2.43	-0.701818
2.432	4.00714
2.434	3.49521
2.436	8.6782
2.438	1.80835
2.44	-5.86249
2.442	6.22376
2.444	4.91993
2.446	-0.898918
2.448	1.83364
2.45	3.6938
2.452	2.27591
2.454	3.12034
2.456	0.298647
2.458	0.458447
2.46	0.788049
2.462	-2.09985
2.464	4.98625
2.466	0.449371
2.468	2.55076
2.47	-2.38575
2.472	-2.9376
2.474	0.445143
2.476	0.311175
2.478	5.17776
2.48	3.36905
2.482	3.23597
2.484	-3.19946
2.486	-1.67104
2.488	1.99832
2.49	0.0834342
2.492	5.02178
2.494	4.87794
2.496	-1.50781
2.498	3.0781
2.5	4.8213
2.502	1.53392
2.504	5.7818
2.506	4.06216
2.508	1.26847
2.51	3.31398
2.512	1.0517
2.514	-1.13017
2.516	0.962328
2.518	-0.377041
2.52	-1.89134
2.522	5.10195
2.524	0.522979
2.526	8.94283
2.528	-0.519402
2.53	2.2363
2.532	5.26704
2.534	8.63177
2.536	0.632833
2.538	-3.02392
2.54	2.003
2.542	-4.87384
2.544	-1.83113
2.546	-0.237131
2.548	3.66261
2.55	3.87899
2.552	-0.19709
2.554	3.31122
2.556	-0.3693
2.558	2.85378
2.56	6.79352
2.562	1.08482
2.564	-0.456556
2.566	-1.24916
2.568	2.41627
2.57	4.2508
2.572	6.69885
2.574	0.141109
2.576	0.643849
2.578	-1.67405
2.58	5.59163
2.582	0.187462
2.584	-1.00964
2.586	7.65485
2.588	3.33019
2.59	2.95378
2.592	-2.79133
2.594	1.58844
2.596	1.71067
2.598	-3.29945
2.6	-0.294033
2.602	-0.637169
2.604	2.50383
2.606	-2.33472
2.608	4.22417
2.61	6.299
2.612	-0.543707
2.614	0.478086
2.616	2.20533
2.618	4.58999
2.62	2.40828
2.622	1.85436
2.624	-1.04031
2.626	-0.158607
2.628	2.85458
2.63	6.66386
2.632	3.4021
2.634	-2.12695
2.636	3.04553
2.638	1.2099
2.64	0.569626
2.642	0.495573
2.644	-1.77368
2.646	-0.214085
2.648	-1.92937
2.65	-0.662886
2.652	1.0352
2.654	1.60219
2.656	0.73742
2.658	1.16986
2.66	1.84335
2.662	3.27999
2.664	6.07053
2.666	3.95188
2.668	0.894206
2.67	3.34327
2.672	0.334359
2.674	-4.65911
2.676	-6.166
2.678	-3.59879
2.68	1.5908
2.682	0.519504
2.684	0.043843
2.686	2.17305
2.688	-0.298141
2.69	-0.28382
2.692	3.68783
2.694	4.16411
2.696	9.23145
2.698	2.01234
2.7	0.923247
2.702	-1.10224
2.704	0.418669
2.706	1.34309
2.708	-3.81072
2.71	1.06494
2.712	4.21278
2.714	-0.0924633
2.716	3.24144
2.718	4.75694
2.72	4.87771
2.722	3.76229
2.724	-6.03979
2.726	-0.609921
2.728	4.31518
2.73	3.07629
2.732	2.13523
2.734	3.74949
2.736	6.12306
2.738	3.15006
2.74	0.304875
2.742	2.2343
2.744	2.06898
2.746	5.45266
2.748	3.67067
2.75	4.1037
2.752	2.97736
2.754	1.57425
2.756	3.16079
2.758	3.73584
2.76	-1.66632
2.762	3.1536
2.764	5.32089
2.766	1.84367
2.768	7.23227
2.77	3.9147
2.772	0.619804
2.774	1.31928
2.776	0.854111
2.778	2.58451
2.78	4.45979
2.782	1.41535
2.784	4.04896
2.786	8.27906
2.788	5.71762
2.79	5.30058
2.792	-0.0287364
2.794	0.716229
2.796	3.05017
2.798	1.79735
2.8	-3.31521
2.802	-3.11461
2.804	5.02192
2.806	-0.461975
2.808	9.08314
2.81	-4.30481
2.812	4.47903
2.814	3.19752
2.816	0.773592
2.818	4.41355
2.82	0.499441
2.822	5.48797
2.824	2.64122
2.826	-3.1306
2.828	-5.64579
2.83	1.51807
2.832	6.40399
2.834	3.62203
2.836	3.29241
2.838	5.16757
2.84	-1.72806
2.842	7.22245
2.844	-0.281882
2.846	2.7017
2.848	1.2627
2.85	2.59865
2.852	-4.41518
2.854	6.69271
2.856	3.86769
2.858	9.09456
2.86	7.65568
2.862	3.46282
2.864	0.495507
2.866	-2.14295
2.868	3.4804
2.87	4.20477
2.872	6.85222
2.874	0.45729
2.876	5.89461
2.878	3.50112
2.88	0.871405
2.882	6.05906
2.884	4.81475
2.886	3.5184
2.888	10.3604
2.89	6.22248
2.892	3.91818
2.894	5.15992
2.896	4.47327
2.898	4.59675
2.9	5.18609
2.902	1.57008
2.904	0.950356
2.906	4.88844
2.908	10.0011
2.91	2.98134
2.912	0.566938
2.914	2.73893
2.916	1.64541
2.918	2.07032
2.92	4.56471
2.922	2.62547
2.924	1.2152
2.926	1.62062
2.928	-1.11685
2.93	0.442823
2.932	-1.09921
2.934	2.08094
2.936	0.565689
2.938	1.92976
2.94	3.22842
2.942	0.27314
2.944	3.9788
2.946	4.97718
2.948	0.571754
2.95	6.83979
2.952	-2.11466
2.954	1.40284
2.956	-2.17408
2.958	1.70759
2.96	-0.967596
2.962	1.81563
2.964	1.51494
2.966	0.168893
2.968	-2.72577
2.97	5.69677
2.972	10.2159
2.974	10.777
2.976	1.77296
2.978	2.89449
2.98	1.47338
2.982	3.43874
2.984	0.714145
2.986	-2.10645
2.988	4.07779
2.99	0.194083
2.992	-2.28244
2.994	11.1835
2.996	2.67874
2.998	4.56582
3	6.93765
3.002	-2.5843
3.004	3.75021
3.006	3.80341
3.008	2.53939
3.01	3.16296
3.012	1.50473
3.014	5.8954
3.016	1.01142
3.018	1.18294
3.02	5.90269
3.022	8.9042
3.024	2.26543
3.026	1.73165
3.028	4.5024
3.03	6.32245
3.032	5.91134
3.034	3.83014
3.036	1.24062
3.038	5.59661
3.04	3.55652
3.042	8.29692
3.044	-0.469113
3.046	4.6468
3.048	8.40178
3.05	2.60942
3.052	1.80922
3.054	0.512849
3.056	2.45656
3.058	2.78385
3.06	4.17135
3.062	1.13496
3.064	4.2283
3.066	1.79947
3.068	2.24516
3.07	0.434356
3.072	2.13717
3.074	14.5515
3.076	14.0316
3.078	6.86862
3.08	5.71677
3.082	-0.820986
3.084	1.55384
3.086	1.74973
3.088	5.75516
3.09	5.895
3.092	4.92612
3.094	3.56578
3.096	1.76731
3.098	4.67261
3.1	8.22695
3.102	5.79369
3.104	4.77427
3.106	6.0696
3.108	5.60452
3.11	-1.52024
3.112	3.94724
3.114	2.90717
3.116	-1.78173
3.118	0.78499
3.12	4.09218
3.122	7.76015
3.124	4.38231
3.126	5.87967
3.128	1.9334
3.13	-2.40707
3.132	4.57212
3.134	1.30195
3.136	8.48773
3.138	10.8271
3.14	4.46417
3.142	9.4748
3.144	8.40131
3.146	0.431148
3.148	4.62559
3.15	5.41498
3.152	6.17681
3.154	6.51566
3.156	6.20062
3.158	5.75237
3.16	2.42498
3.162	4.87114
3.164	-3.0206
3.166	1.14436
3.168	9.19657
3.17	3.30795
3.172	6.47306
3.174	10.1771
3.176	2.42352
3.178	2.12129
3.18	3.53866
3.182	6.29862
3.184	4.07664
3.186	1.67775
3.188	0.00229711
3.19	4.08453
3.192	4.79263
3.194	3.86364
3.196	4.73872
3.198	2.14639
3.2	7.49037
3.202	-1.23301
3.204	6.04085
3.206	7.33612
3.208	2.16766
3.21	4.47273
3.212	5.74373
3.214	3.14827
3.216	5.45717
3.218	7.05123
3.22	2.65325
3.222	8.17553
3.224	8.77568
3.226	6.14525
3.228	5.16504
3.23	1.38725
3.232	6.62456
3.234	0.992243
3.236	9.90389
3.238	6.64903
3.24	6.11843
3.242	4.47087
3.244	-0.854195
3.246	2.44013
3.248	7.43931
3.25	13.9954
3.252	8.64002
3.254	7.18446
3.256	4.30302
3.258	6.04618
3.26	8.27527
3.262	4.07273
3.264	10.9446
3.266	1.36236
3.268	4.52647
3.27	6.28353
3.272	0.0885193
3.274	8.15697
3.276	6.67215
3.278	6.68146
3.28	8.89128
3.282	9.45813
3.284	8.30046
3.286	3.99941
3.288	5.42849
3.29	7.0939
3.292	2.39799
3.294	3.48925
3.296	5.51669
3.298	6.97912
3.3	12.2355
3.302	8.97631
3.304	4.92901
3.306	4.2546
3.308	10.9509
3.31	14.409
3.312	5.80657
3.314	3.65988
3.316	0.899874
3.318	9.00757
3.32	7.35085
3.322	10.4627
3.324	3.89702
3.326	7.424
3.328	4.48205
3.33	10.583
3.332	4.65777
3.334	5.98938
3.336	4.84801
3.338	8.99149
3.34	7.1035
3.342	2.74594
3.344	4.31992
3.346	3.30456
3.348	8.50364
3.35	8.10087
3.352	1.87706
3.354	1.23833
3.356	7.29261
3.358	9.42428
3.36	7.27099
3.362	1.32517
3.364	1.069
3.366	9.04621
3.368	6.18797
3.37	5.80079
3.372	11.3299
3.374	4.41017
3.376	7.24099
3.378	7.9916
3.38	9.27927
3.382	3.9174
3.384	7.72104
3.386	15.302
3.388	1.57757
3.39	7.8897
3.392	5.91769
3.394	4.3121
3.396	4.6038
3.398	9.0934
3.4	15.0685
3.402	5.18707
3.404	9.46184
3.406	5.93893
3.408	13.9826
3.41	9.08947
3.412	6.59611
3.414	8.71559
3.416	6.55881
3.418	10.3531
3.42	6.59709
3.422	4.13793
3.424	8.82602
3.426	13.1898
3.428	4.35816
3.43	7.568
3.432	11.7927
3.434	2.50214
3.436	10.5009
3.438	10.4482
3.44	8.25938
3.442	4.95525
3.444	7.70652
3.446	8.48888
3.448	11.6467
3.45	10.8533
3.452	7.45301
3.454	13.3782
3.456	7.79711
3.458	5.28033
3.46	6.40214
3.462	10.3255
3.464	7.81665
3.466	9.57704
3.468	6.79838
3.47	14.8483
3.472	2.08762
3.474	6.62786
3.476	7.99755
3.478	8.55312
3.48	12.8539
3.482	8.89326
3.484	7.89938
3.486	8.41014
3.488	10.4435
3.49	5.52142
3.492	8.9426
3.494	2.48671
3.496	7.47702
3.498	4.86689
3.5	5.79221
3.502	8.63419
3.504	3.89567
3.506	4.40841
3.508	2.95155
3.51	0.746064
3.512	7.32095
3.514	11.1458
3.516	6.53194
3.518	6.28851
3.52	3.91604
3.522	12.6464
3.524	6.9306
3.526	11.7199
3.528	8.58126
3.53	6.34901
3.532	10.5803
3.534	10.2609
3.536	6.83455
3.538	11.3418
3.54	12.8962
3.542	6.90447
3.544	6.29577
3.546	8.56419
3.548	8.70221
3.55	10.546
3.552	7.52558
3.554	10.788
3.556	11.856
3.558	8.98959
3.56	8.75823
3.562	4.17336
3.564	4.20391
3.566	2.89529
3.568	3.20652
3.57	6.54105
3.572	1.86586
3.574	14.6152
3.576	10.1738
3.578	1.41494
3.58	4.41605
3.582	7.84715
3.584	2.85849
3.586	7.02497
3.588	11.9918
3.59	7.6656
3.592	7.43718
3.594	3.98377
3.596	5.4119
3.598	3.2472
3.6	9.28001
3.602	7.04959
3.604	11.0066
3.606	12.1528
3.608	11.256
3.61	7.54094
3.612	6.03846
3.614	3.7325
3.616	7.80152
3.618	10.0337
3.62	5.40799
3.622	5.79109
3.624	8.62729
3.626	10.0351
3.628	3.34527
3.63	8.75396
3.632	8.6639
3.634	7.39904
3.636	10.7423
3.638	6.71671
3.64	5.31396
3.642	8.69016
3.644	8.97137
3.646	6.57172
3.648	9.74111
3.65	2.56039
3.652	4.28686
3.654	-1.95581
3.656	9.47607
3.658	4.47869
3.66	6.84187
3.662	10.9616
3.664	8.04643
3.666	6.31885
3.668	4.70469
3.67	6.3448
3.672	8.89185
3.674	2.25868
3.676	7.2031
3.678	10.1582
3.68	3.02568
3.682	9.48884
3.684	9.22589
3.686	4.05896
3.688	2.06576
3.69	8.34809
3.692	9.54943
3.694	8.73817
3.696	9.17347
3.698	2.94452
3.7	8.7539
3.702	5.33392
3.704	5.8547
3.706	3.05386
3.708	11.714
3.71	8.67423
3.712	11.2509
3.714	12.7222
3.716	4.16411
3.718	9.635
3.72	7.15059
3.722	9.73522
3.724	10.0473
3.726	9.20432
3.728	4.2656
3.73	6.78637
3.732	8.26793
3.734	17.5374
3.736	11.3503
3.738	15.0077
3.74	9.13368
3.742	8.48462
3.744	9.5394
3.746	5.42436
3.748	10.7067
3.75	6.3024
3.752	2.86922
3.754	10.8257
3.756	3.70499
3.758	3.05251
3.76	9.8057
3.762	5.68298
3.764	5.8885
3.766	8.51708
3.768	7.70052
3.77	8.55279
3.772	9.83021
3.774	4.90919
3.776	4.73079
3.778	2.38882
3.78	8.47755
3.782	12.4695
3.784	8.40042
3.786	12.255
3.788	12.3799
3.79	13.8224
3.792	13.8949
3.794	8.5971
3.796	8.05908
3.798	10.8045
3.8	8.36654
3.802	15.1483
3.804	15.0686
3.806	11.2615
3.808	9.81948
3.81	12.9001
3.812	9.08562
3.814	10.6333
3.816	9.33484
3.818	11.6024
3.82	15.1084
3.822	13.9495
3.824	15.2341
3.826	8.71901
3.828	12.5317
3.83	9.4982
3.832	14.7252
3.834	14.9969
3.836	18.1822
3.838	17.3973
3.84	15.8153
3.842	12.2594
3.844	12.8905
3.846	8.22881
3.848	13.5171
3.85	9.75442
3.852	17.6233
3.854	17.7645
3.856	16.0104
3.858	15.1241
3.86	17.3321
3.862	22.091
3.864	21.1946
3.866	15.3609
3.868	17.4901
3.87	13.3623
3.872	18.0805
3.874	18.9335
3.876	19.2185
3.878	11.509
3.88	18.5669
3.882	14.8746
3.884	16.9743
3.886	21.0113
3.888	19.5964
3.89	18.1938
3.892	20.8919
3.894	24.4907
3.896	17.4899
3.898	15.1628
3.9	15.6108
3.902	16.1551
3.904	17.2602
3.906	21.7946
3.908	13.9595
3.91	21.9329
3.912	18.838
3.914	24.7755
3.916	18.2835
3.918	21.0478
3.92	18.1745
3.922	19.225
3.924	20.6515
3.926	20.5214
3.928	19.3428
3.93	24.6371
3.932	23.2465
3.934	28.348
3.936	22.5177
3.938	27.4365
3.94	17.6049
3.942	26.4495
3.944	25.7481
3.946	23.6675
3.948	27.4001
3.95	28.1376
3.952	28.4834
3.954	26.3639
3.956	26.9445
3.958	23.2451
3.96	22.3574
3.962	25.392
3.964	26.9233
3.966	29.2945
3.968	23.7173
3.97	24.912
3.972	36.3129
3.974	25.0236
3.976	33.0906
3.978	29.7883
3.98	24.6163
3.982	26.0615
3.984	26.021
3.986	28.7644
3.988	32.0827
3.99	22.6176
3.992	34.1902
3.994	30.0463
3.996	25.7975
[truncated: 18,002 more rows]
